# Supplementary material
Source: PubMed Central journal article supplement (PMC1326325)
Supplement: 4-embor886-s1.pdf [file 4-embor886-s1.pdf]

**Supplementary Table I. Protein and enzymatic compositions of the different high molecular weight replication complexes**

| Origin                            | DNA synthesome <sup>a</sup>    |                      |                           |                           | RC complex <sup>b</sup> | RC complex <sup>c</sup>        |
|-----------------------------------|--------------------------------|----------------------|---------------------------|---------------------------|-------------------------|--------------------------------|
|                                   | human cervical carcinoma cells | human leukemia cells | human breast cancer cells | human breast cancer cells | calf thymus             | human cervical carcinoma cells |
| Cell type                         | HeLa cells                     | HL60                 | MDA MB-468                | MCF 7                     |                         | HeLa cells                     |
| Mass                              | 21S                            | n.d.                 | 18S                       | 18S/1 MDa                 | > 900 kDa               | > 19 S                         |
| SV40 DNA replication              | +                              | +                    | +                         | +                         | n.d.                    | n.d.                           |
| RF-C/PCNA-dependent Pol switching | n.d.                           | n.d.                 | n.d.                      | n.d.                      | +                       | +                              |
| Pol $\alpha$ /primase             | +                              | +                    | +                         | +                         | +                       | +                              |
| Pol $\delta$                      | +                              | +                    | +                         | +                         | +                       | +                              |
| Pol $\epsilon$                    | n.d.                           | n.d.                 | +                         | n.d.                      | -                       | +                              |
| DNA helicase                      | +                              | n.d.                 | n.d.                      | n.d.                      | -                       | n.d.                           |
| RNAse H                           | +                              | n.d.                 | n.d.                      | n.d.                      | -                       | n.d.                           |
| Topo I                            | +                              | +                    | +                         | +                         | -                       | +                              |
| Topo II                           | +                              | +                    | +                         | +                         | n.d.                    | n.d.                           |
| RF-C                              | +                              | +                    | +                         | n.d.                      | +                       | +                              |
| RP-A                              | +                              | +                    | +                         | +                         | -                       | +                              |
| PCNA                              | +                              | +                    | +                         | +                         | -                       | -                              |
| DNA ligase I                      | +                              | n.d.                 | +                         | n.d.                      | n.d.                    | +                              |
| PARP                              | +                              | n.d.                 | +                         | n.d.                      | -                       | +                              |
| cyclin A                          | n.d.                           | n.d.                 | n.d.                      | n.d.                      | n.d.                    | +                              |
| cyclin B1                         | n.d.                           | n.d.                 | n.d.                      | n.d.                      | n.d.                    | +                              |
| Cdk1                              | n.d.                           | n.d.                 | n.d.                      | n.d.                      | n.d.                    | +                              |
| Cdk2                              | n.d.                           | n.d.                 | n.d.                      | n.d.                      | n.d.                    | +                              |

<sup>a</sup>Malkas, 1998 ; <sup>b</sup>Maga et al., 1996 ; <sup>c</sup>Frouin et al., 2002; n.d., not determined
